# Supplementary material for: Improved Sample Preparation for Untargeted Metabolomics Profiling of Escherichia coli
Source: PubMed Central journal article supplement (PMC8510244; doi:10.1128/spectrum.00625-21), 2021-10-06
Supplement: spectrum00625-21_supp_1_seq1.pdf [file spectrum00625-21_supp_1_seq1.pdf]

# Supporting Information

## Improved sample preparation for untargeted metabolomics profiling of *Escherichia coli*

Dongyang Ye, Xiaowei Li, Chengfei Wang, Saiwa Liu, Liang Zhao, Jingjing Du, Jian Xu, Jing Li, Lu Tian, Xi Xia#

College of Veterinary Medicine, China Agricultural University, Beijing 100193, China

### Table of Content

|                |     |
|----------------|-----|
| Figure S1..... | S2  |
| Figure S2..... | S3  |
| Figure S3..... | S5  |
| Figure S4..... | S5  |
| Figure S5..... | S6  |
| Figure S6..... | S7  |
| Figure S7..... | S8  |
| Figure S8..... | S9  |
| Figure S9..... | S15 |
| Table S1.....  | S16 |
| Table S2.....  | S19 |

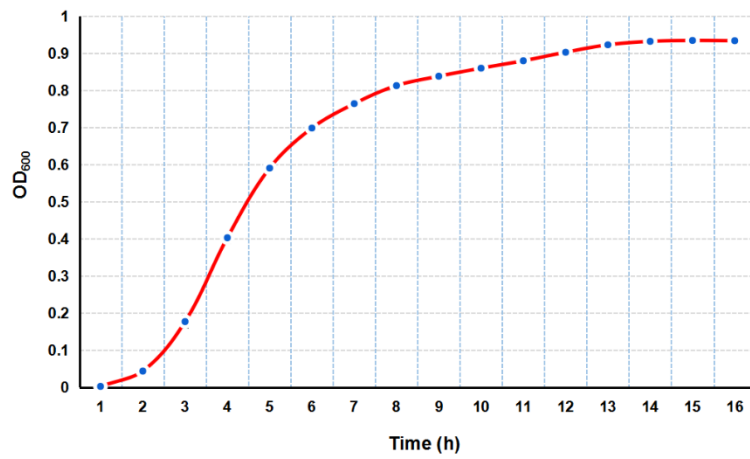

**Figure S1. The growth curve of *E. coli* ATCC 25922.** The OD<sub>600</sub> was measured every hour. The mid-exponential phase of strain was determined according to the growth curve.

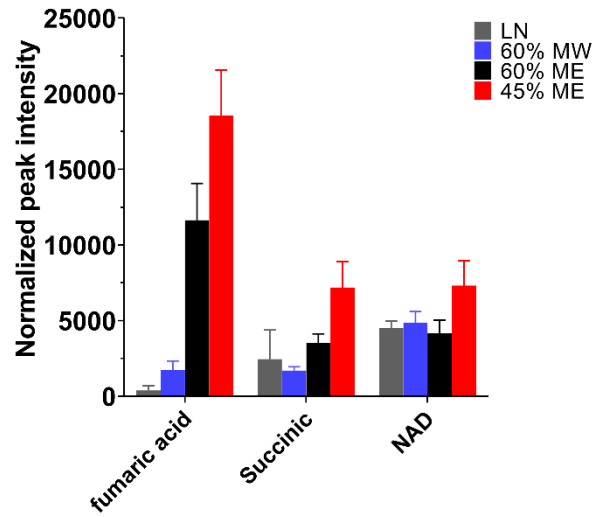

**Oxidative phosphorylation**

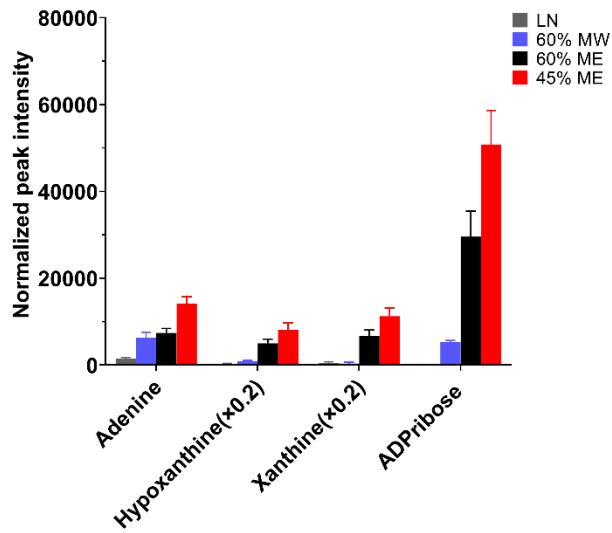

**Purine metabolism**

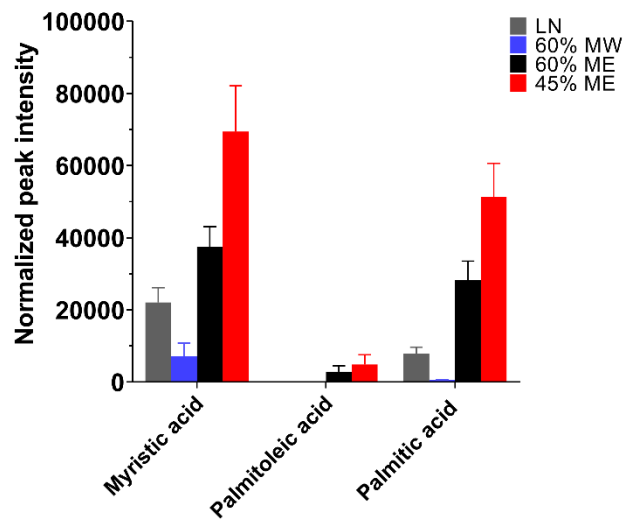

**Fatty acid biosynthesis**

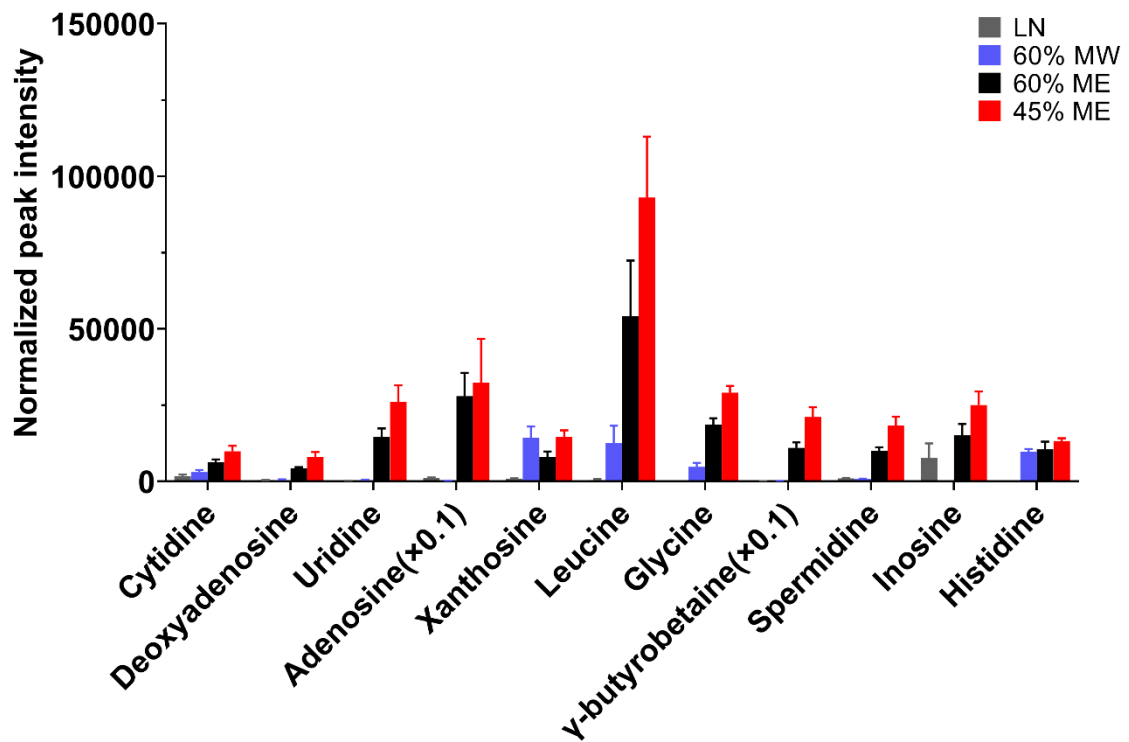

### ABC transporters

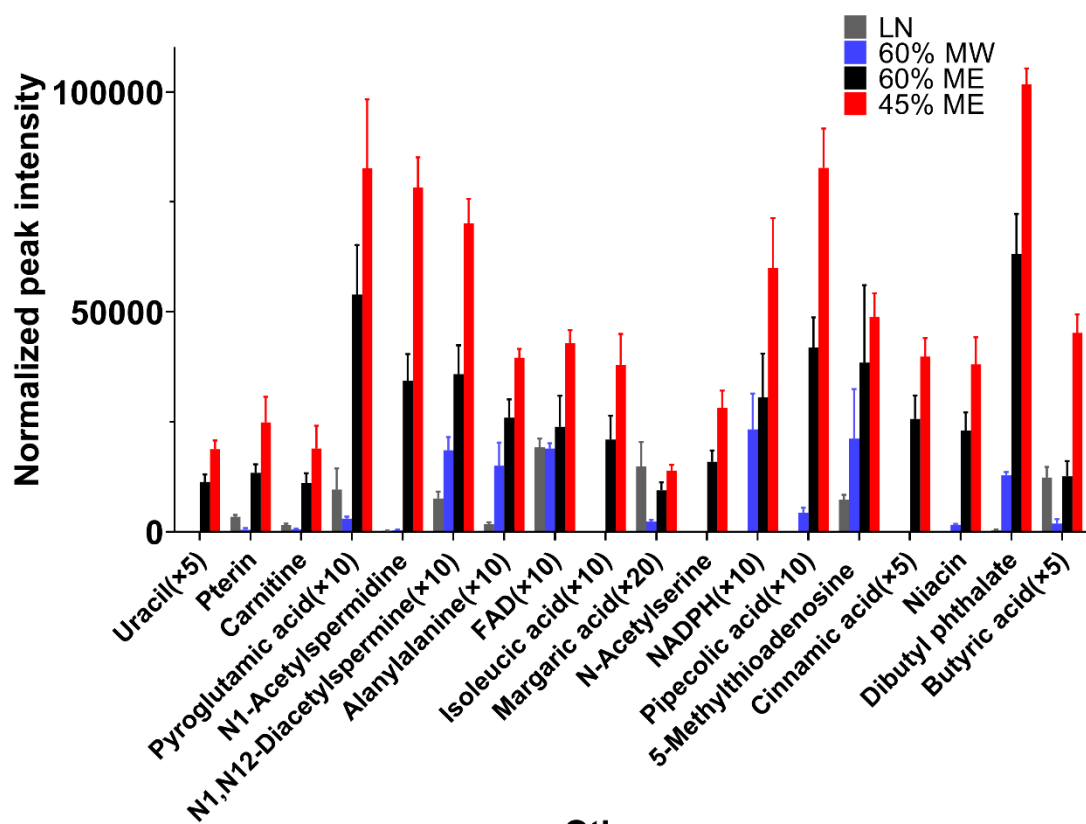

### Others

Figure S2. Abundance of representative metabolites from four quenching approaches.

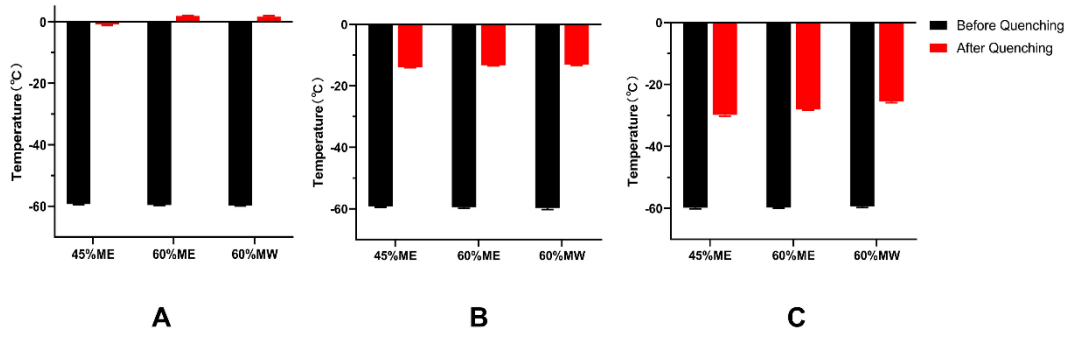

**Figure S3. Effects of sample to quenching solvent ratio on quenching temperature.**  
 (A) Sample to quenching solvent at 1:2. (B) Sample to quenching solvent at 1:3. (C) Sample to quenching solvent at 1:4.

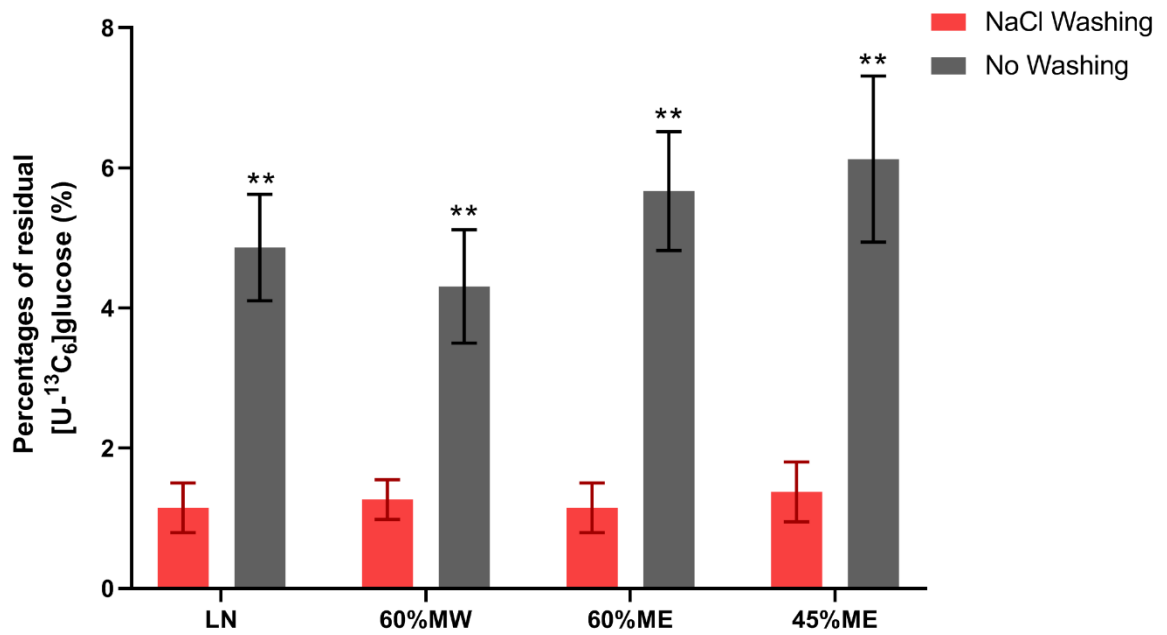

**Figure S4. Percentage of residual [U-<sup>13</sup>C<sub>6</sub>]glucose after NaCl washing.**

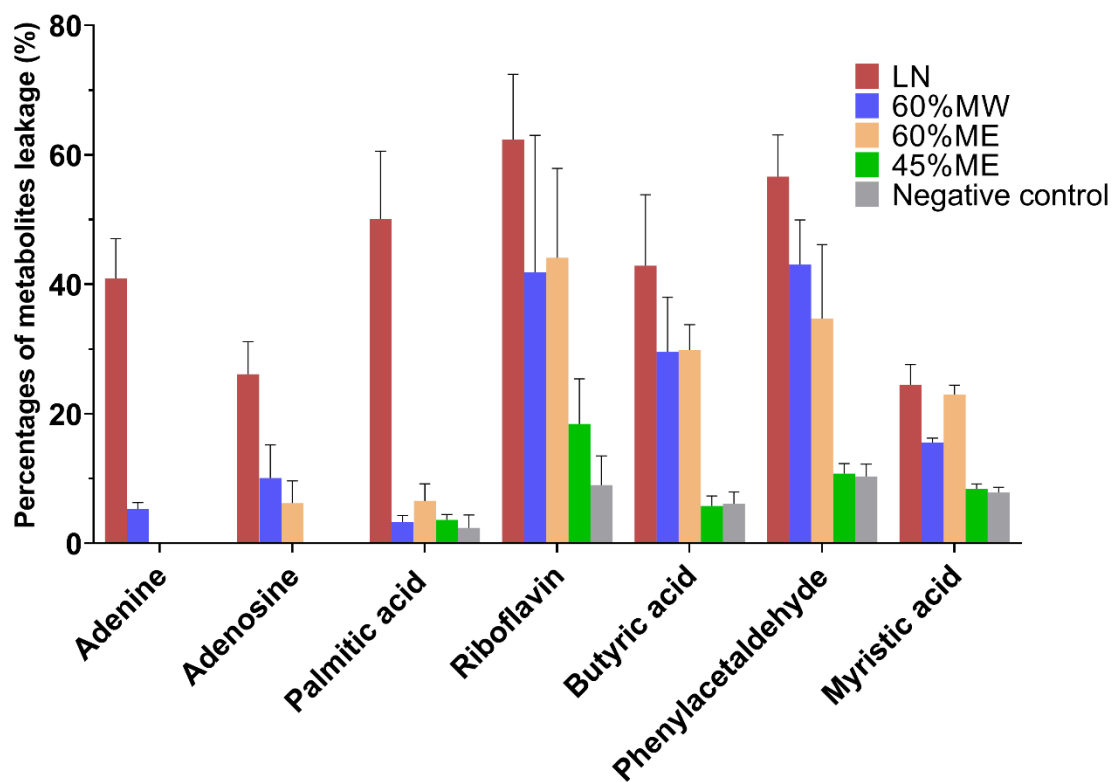

Figure S5. Leakage rate of intracellular metabolites after NaCl washing.

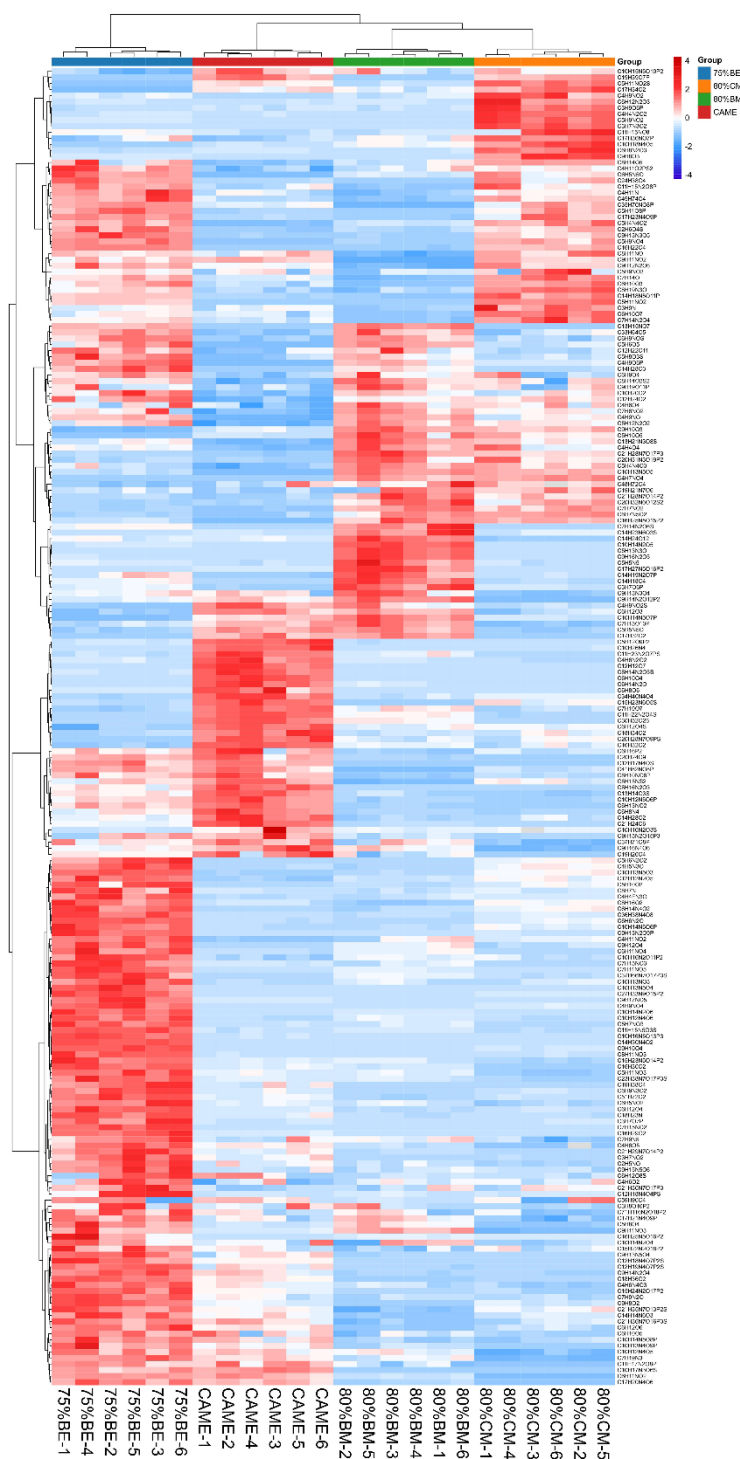

**Figure S6. Hierarchical clustering analysis of intracellular metabolites from *E. coli* using different extraction solvents. Boiling ethanol/water (75% BE; 75:25, v/v, 95°C); cold methanol/water (80% CM; 80:20, v/v, -20°C); boiling methanol/water (80% BM; 80:20, v/v, 80°C); cold acetonitrile/methanol/ethanol/water (CAME; 20:20:20:40, v/v, -20°C).**

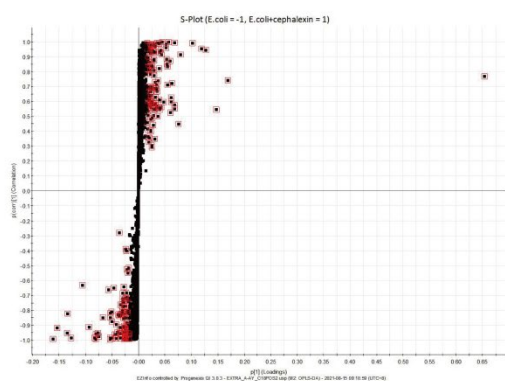

A

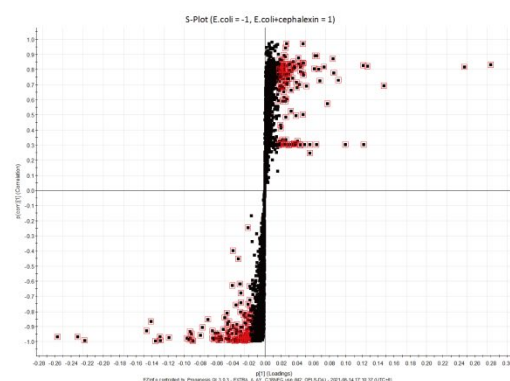

B

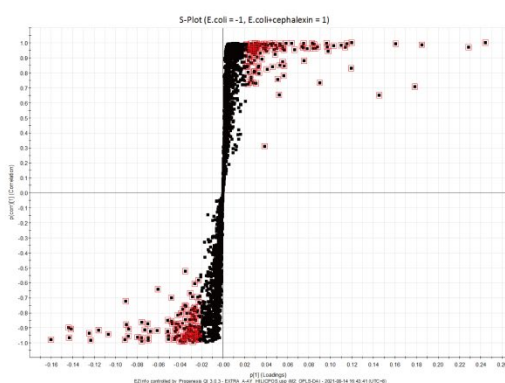

C

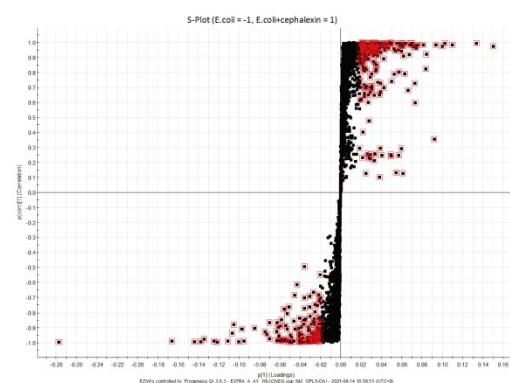

D

**Figure S7. The S-plot of OPLS-DA in differential metabolites analysis. (A) C<sub>18</sub>-positive mode; (B) C<sub>18</sub>-negative mode; (C) Amide-positive mode; (D) Amide-negative mode. The red features:  $VIP > 1$ .**



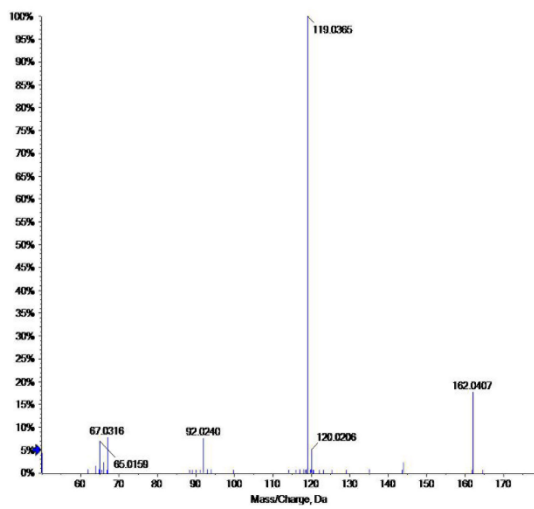

Sample

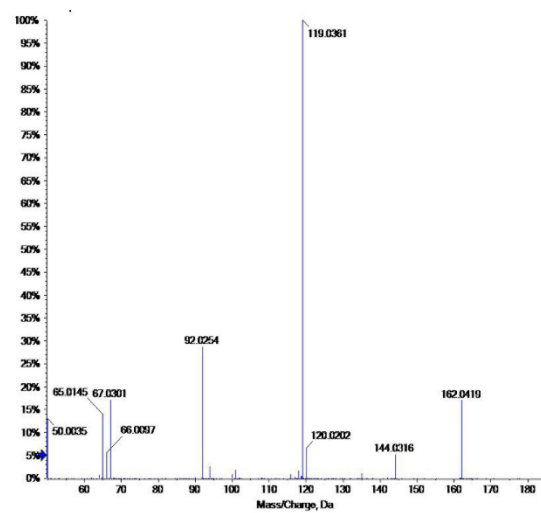

Standard

Pterin (M-H)

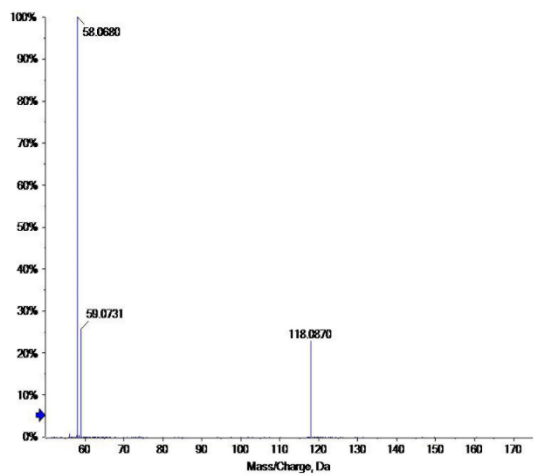

Sample

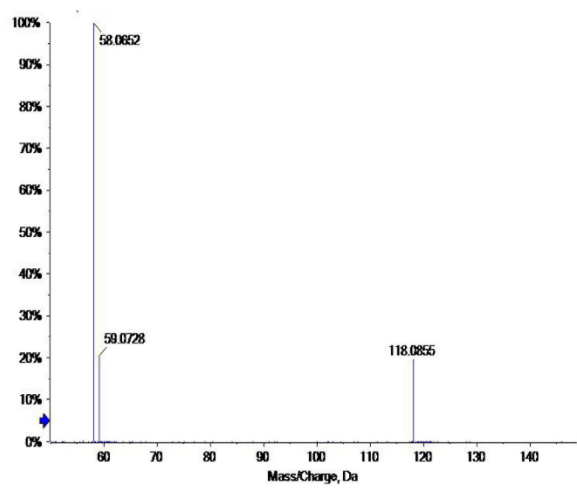

Standard

Glycine betaine (M+H)

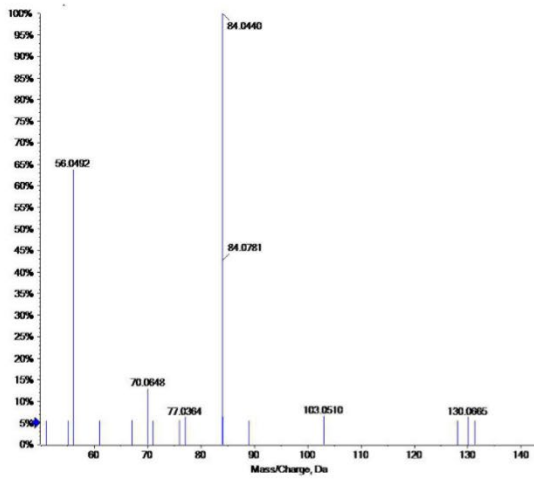

Sample

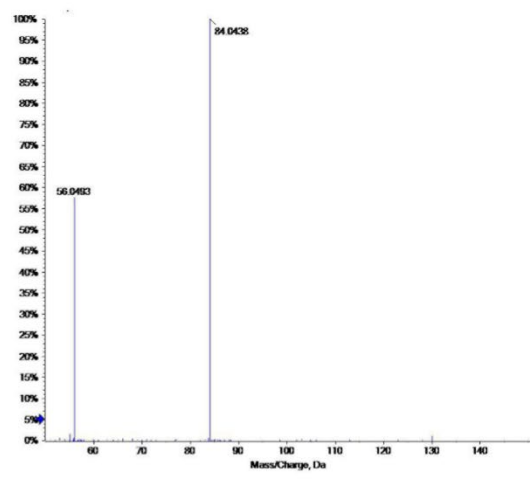

Standard

Pyroglutamic acid (M+H)

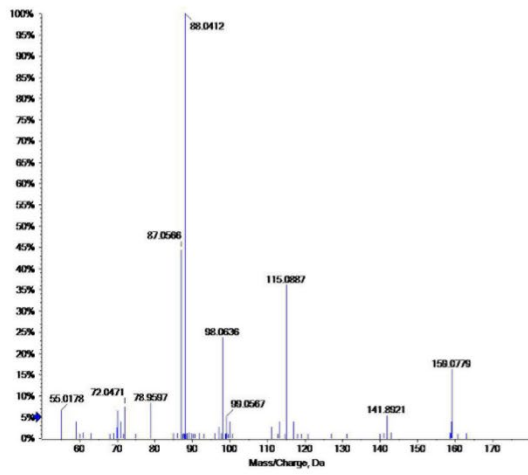

Sample

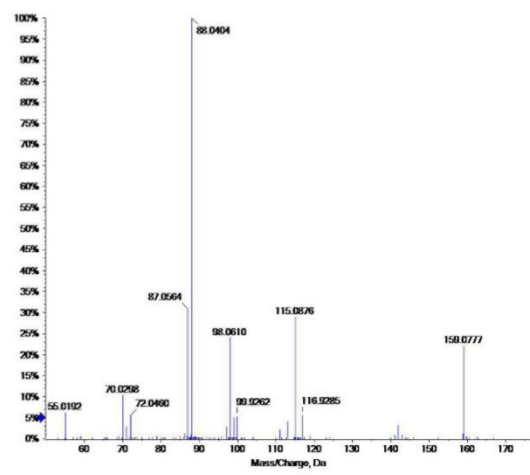

Standard

Alanylalanine (M-H)

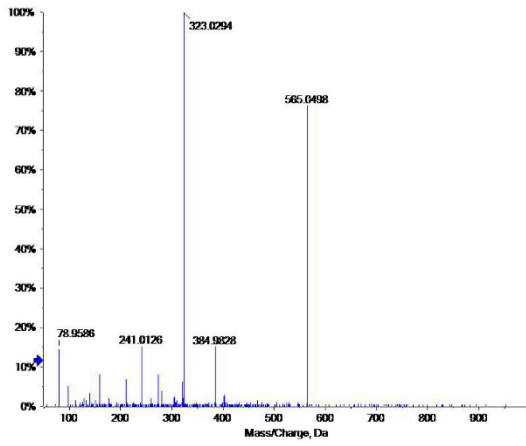

Sample

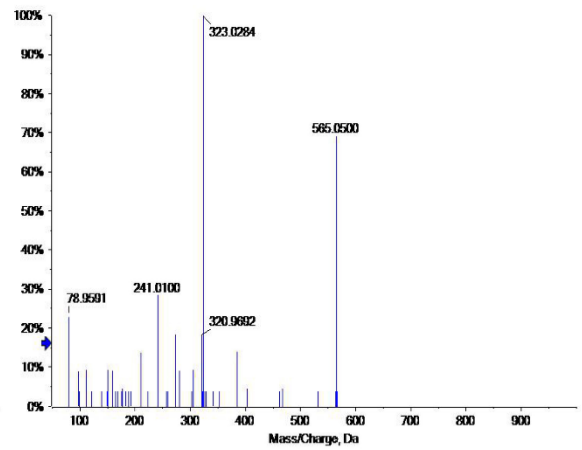

Standard

UDPglucose (M-H)

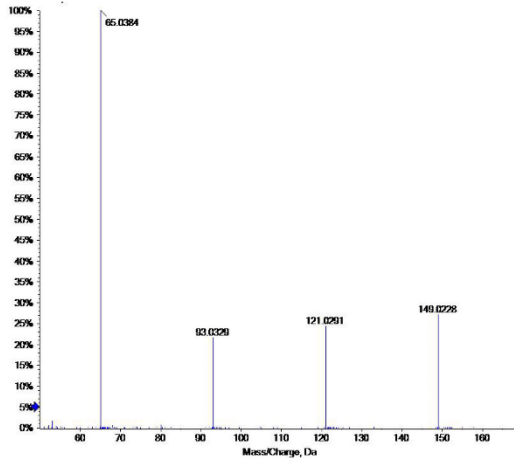

Sample

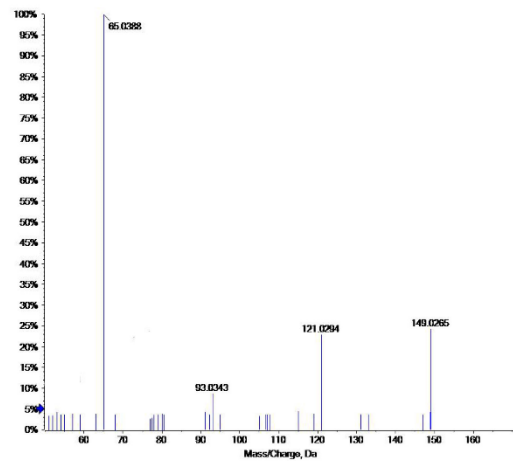

Standard

Cinnamic acid (M+H)

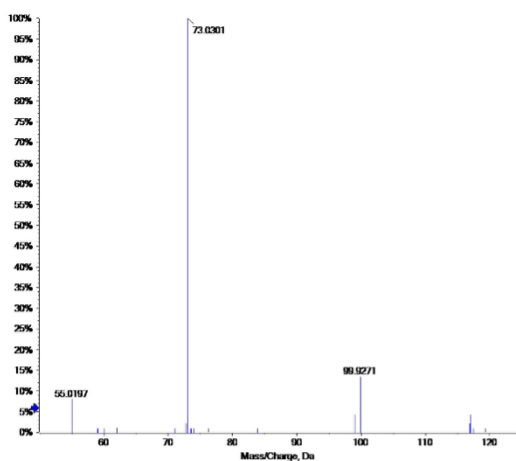

Sample

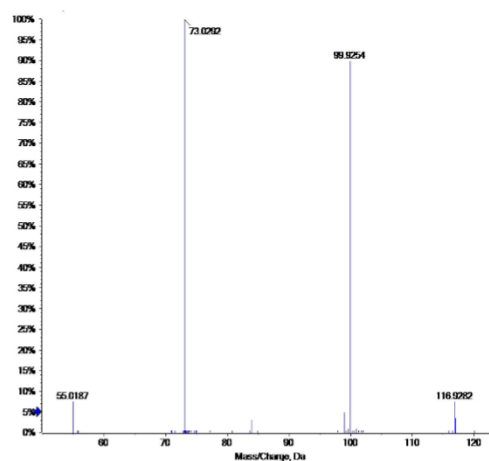

Standard

Succinic acid (M-H)

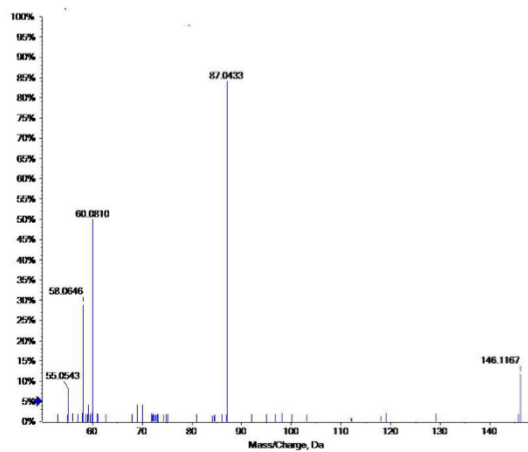

Sample

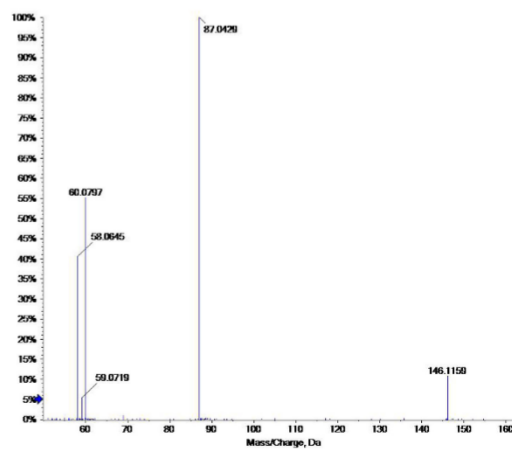

Standard

gamma-butyrobetaine (M+H)

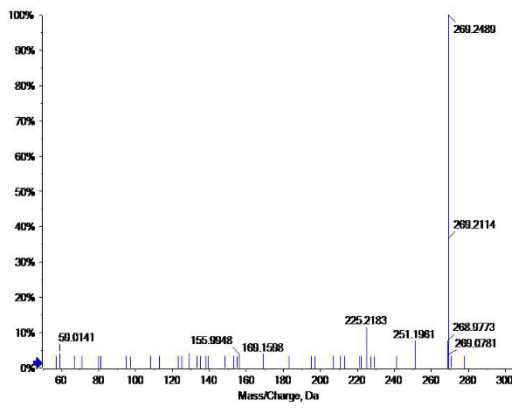

Sample

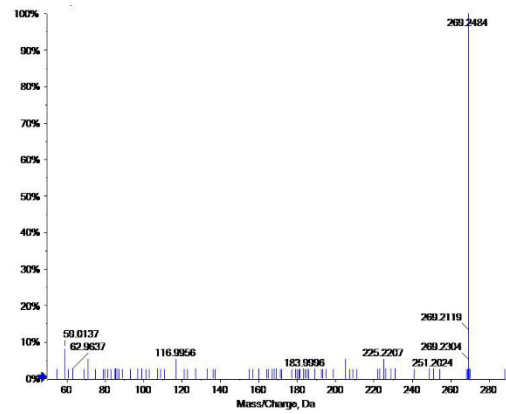

Standard

Margaric acid (M-H)

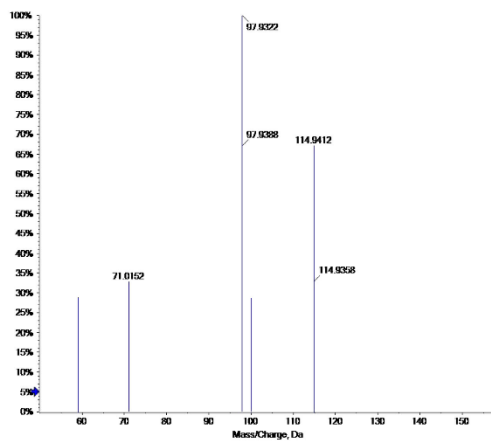

Sample

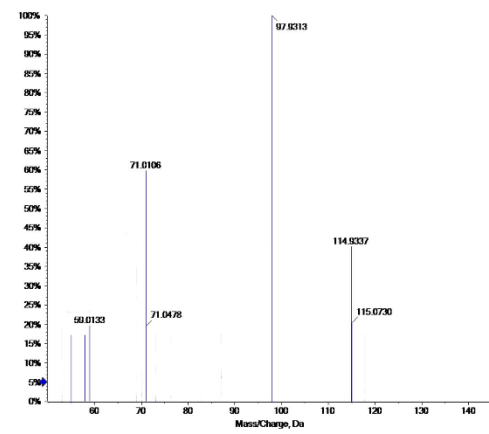

Standard

Fumaric acid (M-H)

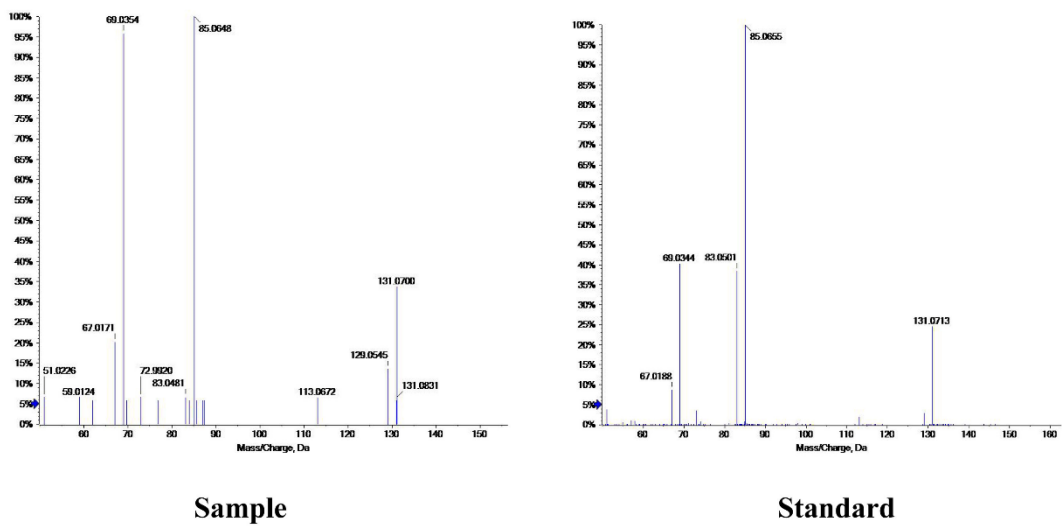

Isoleucic acid (M-H)

Figure S8. Intracellular metabolites identified using standards.

**TCA Cycle, Carbon Metabolism and Pyruvate Metabolism**

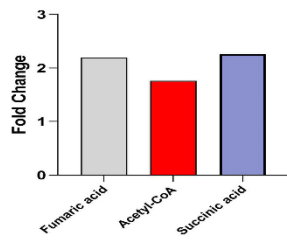

**A**

**Oxidative Phosphorylation**

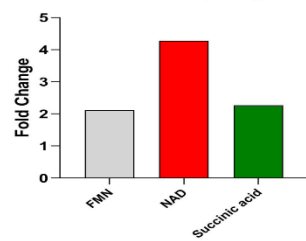

**B**

**Energy Metabolism**

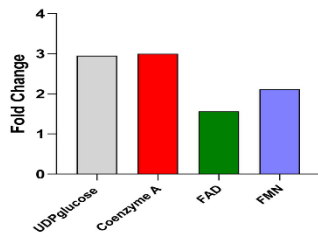

**C**

**Nucleotide Metabolism**

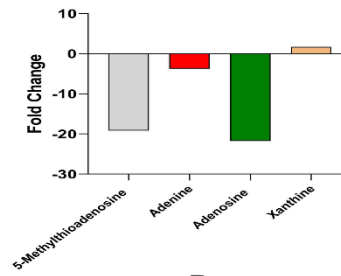

**D**

**Glutathione Metabolism**

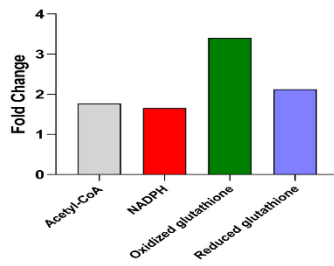

**E**

**Riboflavin Metabolism**

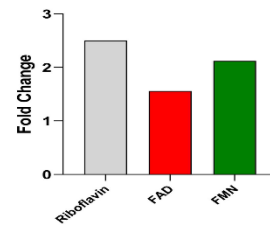

**F**

**Figure S9. Specific pathway alterations induced by cephalixin.**

Table S1 Metabolic perturbations of *E. coli* treated with cephalixin

| Compound            | Mode                | Adducts | Formula                                                                         | Compound ID               | Anova<br>( <i>P</i> -value) | Fold Change |
|---------------------|---------------------|---------|---------------------------------------------------------------------------------|---------------------------|-----------------------------|-------------|
| <b>Upregulated</b>  |                     |         |                                                                                 |                           |                             |             |
| ADPribose           | Amide NEG           | M-H     | C <sub>15</sub> H <sub>23</sub> N <sub>5</sub> O <sub>14</sub> P <sub>2</sub>   | C00301                    | 2.11E-06                    | 2.68        |
| AMP                 | C <sub>18</sub> NEG | M-H     | C <sub>10</sub> H <sub>14</sub> N <sub>5</sub> O <sub>7</sub> P                 | C00020                    | 2.15E-06                    | 4.75        |
| Acetyl-CoA          | Amide NEG           | M-H     | C <sub>23</sub> H <sub>38</sub> N <sub>7</sub> O <sub>17</sub> P <sub>3</sub> S | C00024                    | 0.000337                    | 1.75        |
| Coenzyme A          | Amide NEG           | M-H     | C <sub>21</sub> H <sub>36</sub> N <sub>7</sub> O <sub>16</sub> P <sub>3</sub> S | C00010                    | 3.34E-05                    | 2.93        |
| Cytidine            | Amide POS           | M+H     | C <sub>9</sub> H <sub>13</sub> N <sub>3</sub> O <sub>5</sub>                    | C00475                    | 3.36E-07                    | 6.52        |
| Alanylalanine       | Amide NEG           | M-H     | C <sub>6</sub> H <sub>12</sub> N <sub>2</sub> O <sub>3</sub>                    | C00993                    | 2.08E-07                    | 4.03        |
| Deoxyadenosine      | Amide POS           | M+H     | C <sub>10</sub> H <sub>13</sub> N <sub>5</sub> O <sub>3</sub>                   | C00559                    | 6.50E-11                    | 2.13        |
| FAD                 | Amide NEG           | M-H     | C <sub>27</sub> H <sub>33</sub> N <sub>9</sub> O <sub>15</sub> P <sub>2</sub>   | C00016                    | 2.75E-05                    | 1.53        |
| FMN                 | Amide POS           | M+H     | C <sub>17</sub> H <sub>21</sub> N <sub>4</sub> O <sub>9</sub> P                 | C00061                    | 0.000947                    | 2.06        |
| Glycine betaine     | C <sub>18</sub> POS | M+H     | C <sub>5</sub> H <sub>12</sub> NO <sub>2</sub>                                  | C00719                    | 4.47E-07                    | 2.33        |
| Hypoxanthine        | Amide POS           | M+H     | C <sub>5</sub> H <sub>4</sub> N <sub>4</sub> O                                  | C00262                    | 5.27E-05                    | 1.73        |
| Inosine             | Amide NEG           | M-H     | C <sub>10</sub> H <sub>12</sub> N <sub>4</sub> O <sub>5</sub>                   | C00294                    | 0.004320                    | 1.65        |
| Histidine           | Amide NEG           | M-H     | C <sub>6</sub> H <sub>9</sub> N <sub>3</sub> O <sub>2</sub>                     | C00135                    | 3.20E-07                    | 3.16        |
| Isoleucic acid      | Amide NEG           | M-H     | C <sub>6</sub> H <sub>12</sub> O <sub>3</sub>                                   | HMDB0000317<br>ECMDB24038 | 4.47E-09                    | 5.27        |
| Leucine             | Amide NEG           | M-H     | C <sub>6</sub> H <sub>13</sub> NO <sub>2</sub>                                  | C00123                    | 0.000136                    | 1.55        |
| Margaric acid       | C <sub>18</sub> NEG | M-H     | C <sub>17</sub> H <sub>34</sub> O <sub>2</sub>                                  | ECMDB21506                | 0.000265                    | 2.95        |
| Myristic acid       | C <sub>18</sub> NEG | M-H     | C <sub>14</sub> H <sub>28</sub> O <sub>2</sub>                                  | C06424                    | 1.87E-07                    | 1.98        |
| N1-Acetylspermidine | C <sub>18</sub> POS | M+H     | C <sub>9</sub> H <sub>21</sub> N <sub>3</sub> O                                 | C00612                    | 0.001151                    | 2.05        |
| N-Acetylserine      | C <sub>18</sub> POS | M+H     | C <sub>5</sub> H <sub>9</sub> NO <sub>4</sub>                                   | HMDB0002931<br>ECMDB21441 | 0.0019461                   | 1.98        |



|                          |                     |     |                                                                                |        |           |        |
|--------------------------|---------------------|-----|--------------------------------------------------------------------------------|--------|-----------|--------|
| NADPH                    | C <sub>18</sub> POS | M+H | C <sub>21</sub> H <sub>30</sub> N <sub>7</sub> O <sub>17</sub> P <sub>3</sub>  | C00005 | 0.000485  | 1.59   |
| NAD                      | Amide POS           | M+H | C <sub>21</sub> H <sub>27</sub> N <sub>7</sub> O <sub>14</sub> P <sub>2</sub>  | C00003 | 0.000194  | 4.28   |
| Oxidized glutathione     | C <sub>18</sub> POS | M+H | C <sub>20</sub> H <sub>32</sub> N <sub>6</sub> O <sub>12</sub> S <sub>2</sub>  | C00127 | 3.22E-08  | 3.30   |
| Pantetheine 4'-phosphate | Amide POS           | M+H | C <sub>11</sub> H <sub>23</sub> N <sub>2</sub> O <sub>7</sub> PS               | C01134 | 0.000592  | 2.45   |
| Pipecolic acid           | C <sub>18</sub> POS | M+H | C <sub>6</sub> H <sub>11</sub> NO <sub>2</sub>                                 | C00408 | 0.000236  | 1.84   |
| Reduced glutathione      | Amide POS           | M+H | C <sub>10</sub> H <sub>17</sub> N <sub>3</sub> O <sub>6</sub> S                | C00051 | 0.002727  | 2.05   |
| Riboflavin               | C <sub>18</sub> POS | M+H | C <sub>17</sub> H <sub>20</sub> N <sub>4</sub> O <sub>6</sub>                  | C00255 | 3.97E-05  | 2.45   |
| Fumaric acid             | Amide NEG           | M-H | C <sub>4</sub> H <sub>4</sub> O <sub>4</sub>                                   | C00122 | 1.889E-05 | 2.14   |
| Succinic acid            | C <sub>18</sub> NEG | M-H | C <sub>4</sub> H <sub>6</sub> O <sub>4</sub>                                   | C00042 | 1.34E-05  | 2.19   |
| UDPglucose               | Amide NEG           | M-H | C <sub>15</sub> H <sub>24</sub> N <sub>20</sub> O <sub>17</sub> P <sub>2</sub> | C00029 | 5.19E-08  | 2.88   |
| 5'-UMP                   | Amide POS           | M+H | C <sub>9</sub> H <sub>13</sub> N <sub>2</sub> O <sub>9</sub> P                 | C00105 | 9.64E-05  | 2.17   |
| Uridine                  | Amide NEG           | M-H | C <sub>9</sub> H <sub>12</sub> N <sub>2</sub> O <sub>6</sub>                   | C00299 | 0.000590  | 1.91   |
| Xanthine                 | C <sub>18</sub> POS | M+H | C <sub>5</sub> H <sub>4</sub> N <sub>4</sub> O <sub>2</sub>                    | C00385 | 3.99E-05  | 1.70   |
| Xanthosine               | Amide NEG           | M-H | C <sub>10</sub> H <sub>12</sub> N <sub>4</sub> O <sub>6</sub>                  | C01762 | 9.87E-06  | 1.56   |
| <b>Downregulated</b>     |                     |     |                                                                                |        |           |        |
| Pantothenate             | Amide POS           | M+H | C <sub>9</sub> H <sub>17</sub> NO <sub>5</sub>                                 | C00864 | 6.72E-05  | -21.91 |
| 5-Methylthioadenosine    | C <sub>18</sub> POS | M+H | C <sub>11</sub> H <sub>15</sub> N <sub>5</sub> O <sub>3</sub> S                | C00170 | 4.55E-07  | -18.52 |
| Adenine                  | Amide POS           | M+H | C <sub>5</sub> H <sub>5</sub> N <sub>5</sub>                                   | C00147 | 4.46E-06  | -3.75  |
| Adenosine                | Amide POS           | M+H | C <sub>10</sub> H <sub>13</sub> N <sub>5</sub> O <sub>4</sub>                  | C00212 | 0.000116  | -21.65 |
| Cinnamic acid            | C <sub>18</sub> POS | M+H | C <sub>9</sub> H <sub>8</sub> O <sub>2</sub>                                   | C10438 | 3.28E-06  | -4.79  |
| gamma-butyrobetaine      | C <sub>18</sub> POS | M+H | C <sub>7</sub> H <sub>15</sub> NO <sub>2</sub>                                 | C01181 | 1.17E-05  | -15.72 |
| Carnitine                | Amide POS           | M+H | C <sub>7</sub> H <sub>15</sub> NO <sub>3</sub>                                 | C00318 | 0.000110  | -19.86 |
| Pyroglutamic acid        | C <sub>18</sub> POS | M+H | C <sub>5</sub> H <sub>7</sub> NO <sub>3</sub>                                  | C01879 | 5.73E-05  | -4.07  |
| N1, N12-Diacetylspermine | Amide POS           | M+H | C <sub>14</sub> H <sub>30</sub> N <sub>4</sub> O <sub>2</sub>                  | C03413 | 3.83E-08  | -12.84 |
| Niacin                   | Amide POS           | M+H | C <sub>6</sub> H <sub>5</sub> NO <sub>2</sub>                                  | C00253 | 9.88E-05  | -4.31  |

|                   |                     |     |                                                             |        |          |       |
|-------------------|---------------------|-----|-------------------------------------------------------------|--------|----------|-------|
| Palmitoleic acid  | Amide POS           | M+H | C <sub>16</sub> H <sub>30</sub> O <sub>2</sub>              | C08362 | 0.006405 | -8.62 |
| Pterin            | Amide NEG           | M-H | C <sub>6</sub> H <sub>5</sub> N <sub>5</sub> O              | C00715 | 0.001083 | -1.78 |
| Pyridoxine        | Amide POS           | M+H | C <sub>8</sub> H <sub>11</sub> NO <sub>3</sub>              | C00314 | 2.70E-05 | -1.76 |
| Spermidine        | Amide POS           | M+H | C <sub>7</sub> H <sub>19</sub> N <sub>3</sub>               | C00315 | 5.07E-06 | -2.30 |
| Stearic acid      | C <sub>18</sub> NEG | M-H | C <sub>18</sub> H <sub>36</sub> O <sub>2</sub>              | C01530 | 1.34E-06 | -2.86 |
| Uracil            | Amide POS           | M+H | C <sub>4</sub> H <sub>4</sub> N <sub>2</sub> O <sub>2</sub> | C00106 | 9.01E-06 | -2.55 |
| Dibutyl phthalate | C <sub>18</sub> POS | M+H | C <sub>16</sub> H <sub>22</sub> O <sub>4</sub>              | C14214 | 3.21E-09 | -1.80 |

Table S2 Intracellular metabolites identified using MS/MS.

| Compound                | Mode | Matched fragment ions ( <i>m/z</i> ) |          |          |          |          |          |          |          |         |
|-------------------------|------|--------------------------------------|----------|----------|----------|----------|----------|----------|----------|---------|
| ADPribose               | NEG  | 558.0561                             | 408.0111 | 346.0561 | 290.9686 | 211.0021 | 158.9258 | 96.9710  | 78.9588  |         |
| AMP                     | NEG  | 346.0530                             | 150.9777 | 134.0454 | 107.0395 | 96.9706  | 78.9587  |          |          |         |
| Acetyl-CoA              | NEG  | 808.1252                             | 728.1573 | 461.0558 | 426.0224 | 408.0129 |          |          |          |         |
| FMN                     | POS  | 457.1125                             | 439.1016 | 421.0918 | 359.1361 | 341.1235 | 243.0874 | 198.0678 | 172.0875 |         |
| Coenzyme A              | NEG  | 766.1171                             | 686.1566 | 437.0593 | 426.0231 | 408.0116 | 134.0482 | 78.9582  |          |         |
| Cytidine                | POS  | 112.0496                             | 95.0239  | 94.0380  | 69.0441  |          |          |          |          |         |
| Deoxyadenosine          | POS  | 136.0611                             | 119.0344 | 117.0558 | 99.0438  | 73.0283  |          |          |          |         |
| N1-Acetylspermidine     | POS  | 188.1765                             | 171.1495 | 112.1116 | 100.0759 | 72.0803  | 58.0648  |          |          |         |
| N-Acetyls erine         | POS  | 130.0506                             | 102.0542 | 84.0439  | 56.0496  |          |          |          |          |         |
| Riboflavin              | POS  | 377.1452                             | 359.1332 | 243.0877 | 200.0813 | 198.0676 | 172.0873 |          |          |         |
| Xanthine                | POS  | 153.0410                             | 136.0139 | 110.0347 | 83.0245  | 82.0400  | 55.0290  | 53.0137  |          |         |
| 5-Methylthioadenosine   | POS  | 298.099                              | 249.9998 | 145.0307 | 136.0618 | 119.0353 | 119.035  | 97.0287  | 75.0263  | 61.0102 |
| Hypoxanthine            | POS  | 137.0462                             | 119.0356 | 110.0352 | 94.0402  | 82.0403  | 55.0296  |          |          |         |
| Reduced glutathione     | POS  | 233.0593                             | 179.0492 | 162.0228 | 142.0321 | 116.0158 | 84.0443  | 76.0215  | 58.9947  |         |
| Pantothenate            | POS  | 202.1084                             | 184.0987 | 160.0953 | 142.0865 | 103.0748 | 90.0551  | 72.0441  | 70.0291  | 67.0532 |
| Adenosine               | POS  | 136.0617                             | 118.0870 |          |          |          |          |          |          |         |
| N1,N12-Diacetylspermine | POS  | 287.2387                             | 172.8638 | 171.1471 | 112.1094 | 100.0749 | 98.9831  | 72.0446  |          |         |
| Niacin                  | POS  | 124.0419                             | 80.0511  | 79.0427  | 53.0396  | 52.0214  | 51.0235  |          |          |         |
| Pyridoxine              | POS  | 152.0747                             | 134.0600 | 124.0760 | 94.0658  |          |          |          |          |         |
| Spermidine              | POS  | 112.1125                             | 84.0820  | 72.0808  | 58.0658  |          |          |          |          |         |
| Uracil                  | POS  | 113.0325                             | 96.0105  | 95.0287  | 70.0307  | 69.9960  | 68.0159  | 52.0207  |          |         |
| NAD                     | POS  | 664.1163                             | 542.0678 | 524.0579 | 428.0365 | 348.0701 | 232.0834 | 136.0617 |          |         |
| Carnitine               | POS  | 162.1132                             | 103.0391 | 102.0915 | 85.0285  | 60.0810  | 59.0733  | 58.0655  | 57.0339  |         |

|                          |     |          |          |          |          |          |          |          |          |          |
|--------------------------|-----|----------|----------|----------|----------|----------|----------|----------|----------|----------|
| 5'-UMP                   | POS | 152.9095 | 113.0357 | 97.0284  |          |          |          |          |          |          |
| Adenine                  | POS | 136.0618 | 119.0352 | 109.0514 | 94.0395  | 67.0206  |          |          |          |          |
| FAD                      | NEG | 784.1530 | 517.0494 | 437.0868 | 408.0118 | 346.0546 |          |          |          |          |
| Inosine                  | NEG | 267.0685 | 135.0307 | 108.0206 |          |          |          |          |          |          |
| Palmitoleic acid         | POS | 255.2320 | 97.1019  | 81.0700  | 71.0851  | 69.0710  | 57.0697  | 55.0543  |          |          |
| Oxidized glutathione     | POS | 613.1584 | 595.1453 | 484.1154 | 409.0839 | 355.0734 | 235.0200 | 231.0432 | 177.0329 | 130.0495 |
| Pantetheine 4'-phosphate | POS | 261.1264 | 243.1159 | 175.0549 | 184.0961 | 142.0862 | 132.0467 | 72.0447  |          |          |
| Pipecolic acid           | POS | 130.0873 | 84.0806  | 84.0451  | 70.0649  | 69.0558  | 68.0483  | 67.0564  | 58.0640  | 56.0497  |
| Uridine                  | NEG | 183.0423 | 153.0307 | 140.0355 | 111.0209 | 110.0254 | 82.0289  |          |          |          |
| Xanthosine               | NEG | 283.0684 | 151.0262 | 108.0213 |          |          |          |          |          |          |
| NADPH                    | POS | 746.0109 | 729.0711 | 318.0362 | 302.0435 | 136.0606 |          |          |          |          |
| Dibutyl phthalate        | POS | 205.0848 | 149.0260 | 121.0291 | 93.0335  | 65.0385  | 57.0699  |          |          |          |
| ATP                      | POS | 507.9990 | 428.0356 | 410.0263 | 330.0515 | 249.0526 | 136.0616 |          |          |          |
| ADP                      | POS | 428.0430 | 348.0704 | 330.0561 | 232.0834 | 136.0613 |          |          |          |          |
| Palmitic acid            | NEG | 255.2324 | 237.2220 | 59.0141  |          |          |          |          |          |          |
| Leucine                  | NEG | 130.0861 | 84.0840  | 82.0648  | 78.9555  | 66.0359  |          |          |          |          |
| Myristic acid            | NEG | 227.2067 | 209.1909 | 208.9805 | 85.0335  | 59.0147  |          |          |          |          |
| Stearic acid             | NEG | 283.2604 | 265.2482 | 239.1076 | 183.0036 | 59.0129  |          |          |          |          |
| Butyric acid             | POS | 71.0096  | 61.0282  | 53.0044  |          |          |          |          |          |          |
| Phenylacetaldehyde       | POS | 121.0625 | 93.0451  | 79.0526  | 77.0399  | 65.0345  | 55.0548  | 51.0221  |          |          |
| Histidine                | NEG | 154.0618 | 137.0356 | 93.0471  | 81.0444  | 67.0298  |          |          |          |          |
